1 **Molecular Typing of Human Respiratory Adenoviruses with Universal PCR and**  
2 **Sequencing Primers for Three Major Capsid Genes: Penton base, Hexon, and**  
3 **Fiber**

4  
5 Jing Zhang<sup>1,4</sup>, Siddhartha Sridhar<sup>2</sup>, Susanna K. P. Lau<sup>2</sup>, June Liu<sup>3</sup>, Junxian Ou<sup>1</sup>, Yuqian Yan<sup>1</sup>, Shan  
6 Zhao<sup>1</sup>, Wendong Lan<sup>1</sup>, Wenyi Guan<sup>1</sup>, Jianguo Wu<sup>4</sup>, Patrick C. Y. Woo<sup>2\*</sup>, Donald Seto<sup>3\*</sup>, Qiwei  
7 Zhang<sup>1,4\*</sup>

8  
9 <sup>1</sup> Guangdong Provincial Key Laboratory of Tropical Disease Research, School of Public Health,  
10 Southern Medical University, Guangzhou, Guangdong 510515, China

11 <sup>2</sup> Department of Microbiology, the University of Hong Kong, Hong Kong, China

12 <sup>3</sup> Bioinformatics and Computational Biology Program, School of Systems Biology, George  
13 Mason University, Manassas, Virginia 20110, USA

14 <sup>4</sup> Guangdong Provincial Key Laboratory of Virology, Institute of Medical Microbiology, Jinan  
15 University, Guangzhou, Guangdong 510632, China

16  
17 Running Title: Molecular Typing of Human Adenoviruses

18  
19 \* Correspondence: Patrick C.Y. Woo; Donald Seto, Qiwei Zhang;

20 E-mail: zhangqw@smu.edu.cn; pcywoo@hkucc.hku.hk; dseto@gmu.edu

21

22

23 **Abstract**

24 Human adenoviruses (HAdVs) within species B, C, and E include the predominant types responsible  
25 for highly contagious and potentially severe respiratory infections. The traditional method to type  
26 these pathogens was based on virus neutralization and hemagglutination assays using antisera, which  
27 is both time-consuming and difficult, particularly due to the non-availability of reagents. Molecular  
28 typing based on partial characterization of HAdV hexon, as well as the restriction enzyme analysis  
29 (REA) of the genomics DNA, is difficult to identify recombinants. Here, a rapid, simple, and  
30 cost-effective molecular typing of respiratory HAdVs is presented. This incorporates three pairs of  
31 universal PCR primers that target the variable regions of the three major capsid genes, *i.e.* hexon,  
32 penton base and fiber genes. The protocol developed enables detection and typing of respiratory  
33 HAdVs within species B, C, and E, as well as of some strains within species D and F. Using this  
34 method, we surveyed a total of 100 children with acute respiratory infection caused by HAdVs in  
35 Hong Kong, Summer 2014 (July to October). 100 Throat swab specimens were collected. The  
36 samples were analyzed by PCR and the sequences were characterized by BLAST. HAdVs were  
37 detected in 98 out of 100 (98%) samples. The predominant HAdV type was species B type 3. Among  
38 the patients, 74 were of HAdV-B3 (74%), 10 were of HAdV-E4 (10%), 6 were of HAdV-C2 (21.7%),  
39 2 were of HAdV-C6 (2%), 1 were of HAdV-B7 (2%), 1 were of HAdV-C1 (74%), and 2 were of  
40 recombinant types. The developed method allows the rapid identification of HAdVs with  
41 recombinant genomes, and bypasses the need for whole genome data, for the real-time surveillance  
42 of circulating adenovirus strains in immediate outbreaks and populations by clinical microbiologists,  
43 public health officers, and epidemiologists.

44

45 **Keyword:** Adenovirus, Universal primers, Epidemiology, Molecular Typing, Recombination

46

47

## 48 INTRODUCTION

49 Human adenovirus (HAdV) is responsible for a wide spectrum of human diseases.  
50 Approximately 5-7% of respiratory illnesses diagnosed in young children are attributed to HAdVs (1,  
51 2). Although respiratory tract infections (RTIs) caused by HAdVs are generally self-limiting, a  
52 number of severe and fatal infections have occurred in both children and adults (3-9). In addition to  
53 respiratory tract involvement, HAdVs can cause ocular, gastrointestinal, urinary bladder, and  
54 disseminated infections.

55 To date, more than 90 genotypes have been identified in HAdV species A-G  
56 (<http://hadvvg.gmu.edu/>). Among these seven species, species B types (HAdV-3, -7, -14, -16, -21,  
57 and -55) and one species E type (HAdV-4) are commonly associated with acute respiratory disease  
58 (ARD), which accounts for a high proportion of respiratory diseases in both children and adults (4, 5,  
59 10-16). The types in species C (HAdV-1, -2, -5, -6, and -57) are generally associated with mild  
60 respiratory diseases and latent infections, while those in species D cause eye diseases and  
61 gastroenteritis. HAdV species A, F, and G are associated with gastroenteritis (17). The  
62 predominant types detected in association with disease differ among different countries or regions,  
63 and change over time (18-20). Serotypes 1 to 7 account for > 80% of HAdV infections in infants  
64 and children (21). Globally, HAdV-B3 is among the most common serotypes implicated in HAdV  
65 infections in children and adults (18, 22, 23). In South America, HAdV-B7 has been a  
66 predominant strain associated with RTI requiring hospitalization in many countries (24, 25). In Asia,  
67 HAdV-B3 and -B7 have been the predominant types associated with RTI in children (6, 12, 13, 18,  
68 24, 26-29). In Europe, HAdV-B3 and HAdV-B7 are highly virulent and potentially lethal subtypes,  
69 especially for children (4). Historically, serotypes HAdV-B7 and -E4 predominated as a cause of

70 ARD among military personnel in the United States (15, 20, 30, 31).

71 Fatal ARD outbreak caused by HAdV-3 infection was also reported (32). In  
72 immunocompromised patients in the transplant setting, some of the most commonly reported  
73 adenovirus types include HAdVC1,-C2, -C5, -A12, -A31, -B3, -B11, -B16, -B34, and -B35(33).

74 As a result, it is important to type HAdVs accurately and rapidly for epidemiological  
75 investigations and clinical diagnoses in order to provide information on the incidence and  
76 distribution of infections by individual types, as well as to detect and characterize novel emergent  
77 strains in the context of outbreaks (34-38).

78 HAdVs are traditionally typed according to serum neutralization and  
79 hemagglutination-inhibition tests, which is time-consuming. Molecular typing is based on partial  
80 characterization of HAdV hexon genes, as well as the restriction enzyme analysis (REA) of the  
81 genomics DNA, is difficult to identify recombinants. HAdV isolates with identical  
82 serum-neutralizing attribution but with distinct biological or pathogenic characteristics have been  
83 reported (39-42), challenging the traditional view of “hexon-centric” identification. With the recent  
84 development in whole genome sequencing and bioinformatics analysis, a wider range of HAdV  
85 genomes from clinical isolates have been sequenced and analyzed (43). An important finding is  
86 that recombination, scored in many cases by the three capsid genes, *i.e.*, penton base, hexon, and  
87 fiber genes, and contributes to the genesis of novel and emergent pathogenic HAdVs. Among the  
88 29 recent pathogenic genotypes identified and recognized since HAdV-52, nearly all are  
89 recombinants (39, 40, 44-52). For example, HAdV-B55 is a Trojan horse; this HAdV-B  
90 [P14H11F14] is an intertypic recombinant of HAdV-B11 and HAdV-B14 virus (46, 53, 54). It has a  
91 HAdV-14 genome chassis, including the HAdV-14 penton gene and fiber gene, but a partial

92 HAdV-11 hexon gene, which encodes the antigenic epitopes of the virus. This virus could not only  
93 possess the virulence of HAdV-14 but also avoid the neutralizing antibody against HAdV-14. It  
94 was previously mistyped as HAdV-11a by partial hexon sequencing and REA due to incomplete gene  
95 analysis and incorrect application of the REA method (55);

96 Whole genome sequencing is still unfeasible for large-scale molecular epidemiological studies,  
97 as well as for rapid identification of viral pathogens during outbreaks (38, 56). Therefore, to  
98 circumvent the limitations of using only the hexon for sampling adenoviral pathogens, and also to  
99 overcome the high sequence diversity between different HAdV species, we developed a simple, rapid,  
100 cost-effective, practical, and universal typing method for the epidemiological surveillance of human  
101 respiratory adenoviruses.

102 At the same time, in this study, we investigated the clinical features and molecular  
103 epidemiology of HAdVs circulating among inpatient and outpatient children during the ARD  
104 outbreak in the summer of 2014 in Hong Kong, using our developed HAdV molecular typing method.  
105 This is the first report of ARD outbreak caused by HAdVs in Hong Kong as well as the first detailed  
106 molecular epidemiological survey of HAdVs in Hong Kong.

107

108

## 109 **MATERIALS AND METHODS**

### 110 **Viruses and other materials**

111 Adenovirus strains HAdV-B3, -B7, -B11, -B14, -B21, -B55, -C5, -D19, -E4, and -F41 have  
112 been isolated, identified, and archived in our laboratory (6, 10, 13, 46, 58, 59). Taq PCR Master  
113 Mix kits (Takara; Japan), QIAamp DNA Mini Kit (QIAGEN; China), PCR cleanup kit (Axygen) were

114 used according to manufacturer instructions. DL10000 and DL2000 DNA Markers were the  
115 product of TAKARA Corp.

116

### 117 **Patients and clinical specimens**

118 From July 2014 to October 2014, there was a sudden increase in pediatric outpatients and  
119 inpatients with influenza-like symptoms in Queen Mary Hospital, Hong Kong. nasopharyngeal swab  
120 specimens were collected from patients and respiratory viral pathogens were detected.

121 This study protocol was approved by the Institutional Ethics Committee of Mary Hospital and  
122 was carried out in accordance with the approved guidelines. Legal guardians of all underage  
123 participants gave signed informed consent for their participation in this study. Data records of the  
124 samples and sample collection were de-identified and anonymized.

125

126 Detection of human adenovirus and other common respiratory pathogens with Immunofluorescent  
127 Kits

128 Total nucleic acid was extracted from respiratory specimens using a QIAamp DNA Mini Kit  
129 (QIAgen), in accordance with the manufacturer's protocol. Adenovirus and other ten common  
130 respiratory pathogens were detected using Taqman real-time PCR kit according to the manufacturer's  
131 protocol, including influenza A virus (infA), influenza B virus (infB), parainfluenza virus (PIV),  
132 respiratory syncytial virus (RSV), enterovirus (EV), human metapneumovirus (hMPV), bocavirus  
133 (BOV), rhinovirus (RHV), Mycoplasma pneumoniae (MP), and Chlamydia pneumonia (CP) (Co.  
134 LTD;China).

135

## 136 **Adenovirus culture and isolation**

137 The 100 HAdV-positive throat swab specimens collected from 100 patients were inoculated  
138 onto A549 cells and were cultured in a maintenance medium (Minimal Essential Medium containing  
139 2% fetal bovine serum, 100 U/ml penicillin G and 100 µg/ml streptomycin) at 37°C in an atmosphere  
140 containing 5% (v/v) carbon dioxide, and cytopathic effect (CPE) was monitored for 5-7 days. If no  
141 CPE was observed, the cells would be freezeed and thawed for three times and passaged in A549  
142 again to check CPE.

143

## 144 **PCR primers design and PCR amplification**

145 The penton base, hexon, and fiber gene sequences from HAdV-A18, -B3, -B7, -B11, -B14, -B16,  
146 -B21, -B34, -B35, -B50, -B55, -B66, -B68, -C1, -C2, -C5, -C6, -D19, -D37, -E4, -F41, and -G52  
147 were obtained from GenBank, and were aligned using ClustalW to find regions with high sequence  
148 similarities. Primers targeting the three capsid genes were designed based on these bracketing  
149 conserved regions and ordered from Invitrogen (Guangzhou).

150 PCR reactions were conducted in a total volume of 20 µL containing 1× Taq Master Mix (10  
151 µL), primer F (10 µmol/L, 0.5 µL), primer R (10µmol/L, 0.5 µL), DNA template (1 µL), and water (8  
152 µL). Primers Penton-F and Penton-R were designed for both PCR amplifying and DNA sequencing  
153 of the penton base gene. PCR was performed as follows: 94 °C for 1 min; 34 cycles of 94 °C for 30  
154 s; 52 °C for 30 s; and 72 °C for 100 s, with a final extension of 72 °C of 10 min. Primers HVR-F  
155 and HVR-R were used for the hexon gene. PCR was performed as follows: 94 °C for 1 min; 34  
156 cycles of 94 °C for 30 s; 52°C for 30 s; and 72 °C for 100 s, with a final extension of 72 °C of 10 min.  
157 Primers Fiber-F and Fiber-R were designed for the fiber gene. The PCR amplification conditions



158 for this are as follows: 94 °C for 1 min; 34 cycles of 94 °C for 30 s; 52 °C for 30 s; and 72 °C for 72 s,  
159 with a final extension of 72 °C of 10 min.

160

### 161 **Sequencing and molecular typing of clinical adenovirus specimens**

162 All three major capsid genes of the HAdV isolates were PCR-amplified by the corresponding  
163 pairs of universal primers. These PCR products were purified and sequenced directly with both  
164 PCR primers by Invitrogen (Guangzhou; China). The assembled DNA contigs were characterized  
165 by a BLAST survey of the NCBI GenBank database. The molecular type of each clinical  
166 specimen was determined in accordance to the highest sequence identities.

167

### 168 **Genome sequences used for alignments**

169 Archived genome sequences from GenBank were used for the alignments of the penton base,  
170 hexon, and fiber genes. Their accession numbers are as follow: HAdV-A12 (X73487), HAdV-B3  
171 (DQ099432), HAdV-B3 (AY599834), HAdV-B7 (AY594255), HAdV-B7 (KC440171), HAdV-B11  
172 (AY163756), HAdV-B14 (AY803294), HAdV-B16 (AY601636), HAdV-B21 (AY601633),  
173 HAdV-B34 (AY737797), HAdV-B35 (AY128640), HAdV-B50 (AY737798), HAdV-B55  
174 (JX491639), HAdV-C1 (AC\_000017), HAdV-C2 (J01917), HAdV-C5 (AC\_000008), HAdV-C6  
175 (KY268129), HAdV-D9 (AJ854486), HAdV-E4 (AY594253), HAdV-F40 (KU162869),  
176 HAdV-G52 (DQ923122), SAdV-25 (AC\_000001), SAdV-26 (FJ025923).

177

### 178 **Phylogenetic analysis**

179 The Molecular Evolutionary Genetics Analysis (MEGA) version 7.0 software  
180 ([www.megasoftware.net/](http://www.megasoftware.net/)) was used for phylogenetic analyses of penton base, hexon, and fiber genes  
181 from the clinical specimens, along with additional reference sequences retrieved from GenBank  
182 database. Phylogenetic trees were constructed using the maximum parsimony method with a  
183 bootstrap test of 1000 replicates and the Tree-Bisection-Reconnection (TBR) model.

184

## 185 **RESULTS**

### 186 **Three pairs of universal primers targeting the three major capsid genes: penton base, hexon,** 187 **and fiber genes**

188 Three pairs of universal primers were designed for PCR amplification and sequencing of HAdV  
189 penton base, hexon, and fiber genes. Primers Penton-F and Penton-R were designed based on the  
190 conserved regions of the penton base sequences. Within the alignment of sequences, primer  
191 sequences for Penton-F and Penton-R are highly conserved in the majority of penton base genes,  
192 which ensures that all of the analyzed adenovirus types within species A to G could be  
193 PCR-identified (Fig. 1(B)). The resultant PCR product is 1253bp (Table 1), located within penton  
194 base gene and contains the variable region HVR1 and the RGD loop (Fig. 1(A)).

195 For the hexon, the universal amplification primers HVR-F and HVR-R were designed. The  
196 primer sequences are conserved in HAdV types across all of the species analyzed, yielding a PCR  
197 product of about 1685 bp (Table 1). This amplicon contains the seven hypervariable regions (HVRs)  
198 comprising Loops 1 and 2 (Fig. 1(A)).

199 Primers Fiber-F and Fiber-R were designed for fiber gene. Point mutations of primer Fiber-F  
200 exist only in one or two nucleotides located in the middle of the primers; this ensures an effective

201 PCR amplification of the different HAdV types (Fig. 1(A)). These primers amplify HAdV types  
202 from species B, D, and E, yielding a PCR product of about 1153 bp for HAdV-B and -D, and 1519  
203 bp for HAdV-E4. However, during the high variation and long fiber gene (about 1746 bp) of  
204 species C, Fiber-R matches poorly with types in HAdV-C. To compensate, another primer  
205 Fiber-CR was designed to completely match the sequences within species C (Table 1).

206

**A**

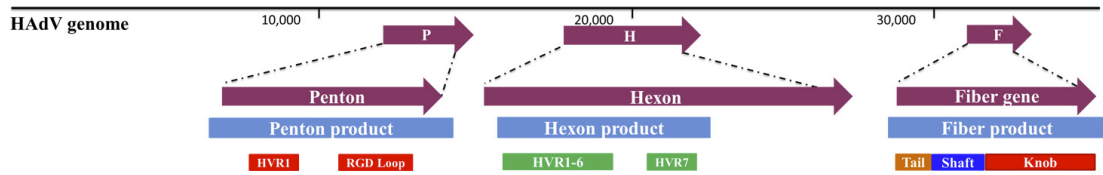

**B**

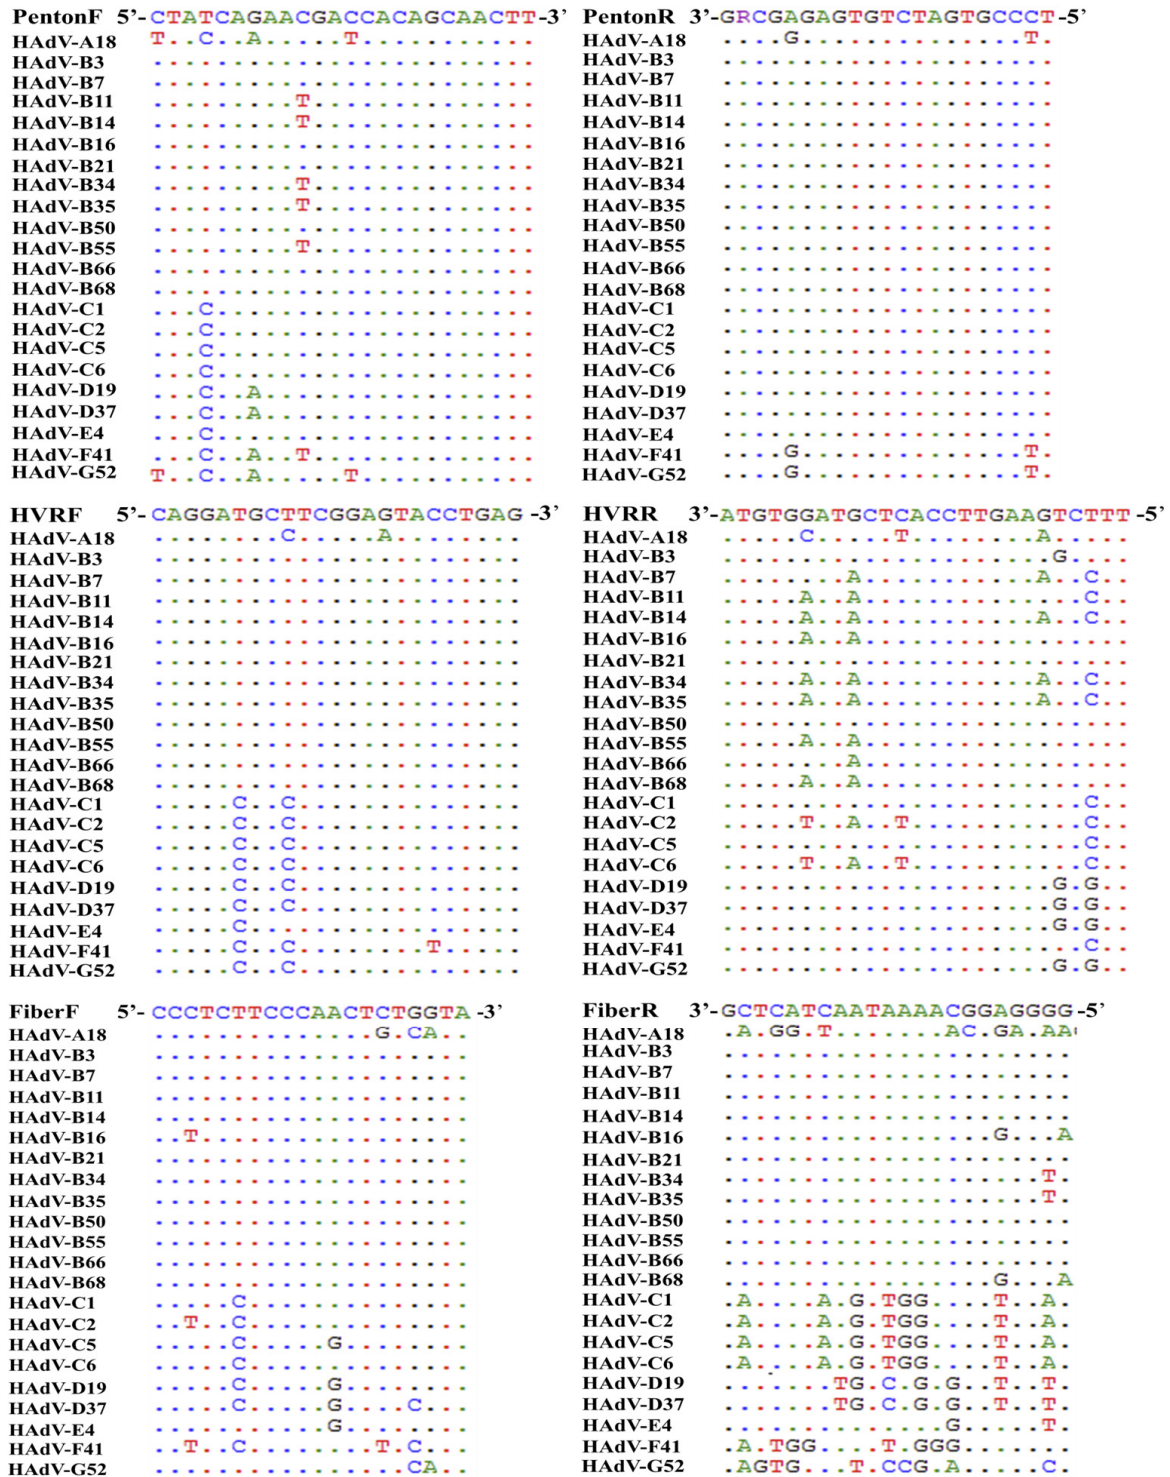

208 **Fig. 1 (A). Alignment of human adenovirus (HAdV) universal primers for HAdV-A18, B3, -B7, B-11, -B14,**  
209 **-B16, -B21, -B34, -B35, -B50, -B55, -B66, -B68, -C1, -C2 -C5, -C6, -D9, -D19, -D37, -E4, -F41, and -G52.**

210 Divergence from the primer sequences are shown for the isolates tested. Each virus is identified with type number  
211 as well as species demarcation for reference. Dots represent identical bases, base changes are noted, and the bases  
212 are color-coded for visual comparisons. And (B). **Schematic adenovirus genome, with the primer positions and**  
213 **the resultant PCR products noted for the three major capsid protein genes: penton base (left), hexon**  
214 **(middle), and fiber (right) genes.** The relative locations of the capsid protein genes in the HAdV genome are  
215 noted. These genes contain the typing and molecular characterization information for HAdVs. The purple  
216 arrows indicate the genes and their locations; the blue bars indicate the PCR products and the relative length; and  
217 the other colored bars indicate the important domains within each gene, including hypervariable regions (HVRs and  
218 RGD Loops), as well as the tail, shaft, and knob domains.

219

220 **Table 1. Universal primers for the detection, typing and sequencing of human adenoviruses.** Sequences,  
 221 genome locations, and the resultant predicted PCR product sizes are noted for each of the three major capsid  
 222 protein genes.

| Gene           | Position        | Length <sup>a</sup><br>(bp) | Primer   | Primer sequence                  | Positio<br>n <sup>a</sup> | PCR<br>product                        | PCR<br>condition                                                                   |
|----------------|-----------------|-----------------------------|----------|----------------------------------|---------------------------|---------------------------------------|------------------------------------------------------------------------------------|
| Penton<br>base | 13904<br>-15538 | 1635                        | Penton-F | 5'-CTATCAGAACGACCACAGCAACTT-3'   | 14152<br>-14175           | 1253 bp                               | 34 cycles<br>of 94 °C<br>for 30 s;<br>52 °C for<br>30 s; and<br>72 °C for<br>100 s |
|                |                 |                             | Penton-R | 5'-TCCCGTGATCTGTGAGAGCRG-3'      | 15384<br>-15404           |                                       |                                                                                    |
| Hexon          | 18422<br>-21256 | 2835                        | HVR-F    | 5'-CAGGATGCTTCGGAGTACCTGAG-3'    | 18473<br>-18495           | 1685 bp                               |                                                                                    |
|                |                 |                             | HVR-R    | 5'-TTTCTGAAGTTCCACTCGTAGGTGTA-3' | 20132<br>-20157           |                                       |                                                                                    |
| Fiber          | 31301<br>-32260 | 960<br>(1278 <sup>b</sup> ) | Fiber-F  | 5'-CCCTCTTCCCAACTCTGGTA-3'       | 31180<br>-31199           | 1153 bp<br>(1519<br>bp <sup>b</sup> ) |                                                                                    |
|                |                 |                             | Fiber-R  | 5'-GGGGAGGCAAATAACTACTCG-3'      | 32311<br>-32332           |                                       |                                                                                    |
|                |                 |                             | Fiber-CR | 5'-GAGGTGGCAGGTTGAATACTAG-3'     | 32311<br>-32332           |                                       |                                                                                    |

223 a) Positions are in the reference genome of HAdV-B3 (GenBank acc. no. DQ099432).

224 b) The length of HAdV-4 fiber gene, for reference.

225 c) The length of the PCR product of HAdV-C fiber gene, for reference.

226

227

228 **PCR identification of HAdV-B3, -B7, -B11, -B14, -B21, -B55, -C5, -D19, -E4, and -F41 using**  
229 **universal primers targeting the three capsid genes**

230 Genomic DNA of strains of HAdV-B3, -B7, -B11, -B14, -B21, -B55, -C5, -D19, -E4, and -F41  
231 were extracted and detected by PCR using these three pairs of universal primers. All of these  
232 HAdV types are detected by PCR amplification. The PCR products were specific, yielding single  
233 distinct products. The sizes of the PCR products are identical with the expected sizes: 1.2 kb (penton  
234 base), 1.6 kb (hexon), and 1.1 kb (fiber), respectively. There are two exceptions: one is the  
235 HAdV-E4 fiber gene (1519 bp) and the other is the HAdV-C5 fiber gene (2027bp). Both gene  
236 products are longer than their counterparts in the other HAdV types.

237

238 **Demographic characteristics and clinical features of HAdV-positive children with ARD in**  
239 **Hong Kong**

240 Total 100 HAdV-positive samples were collected and analyzed, (Table2). It showed that the  
241 male and female rates were 50% and 49%, respectively. No significant gender difference was found.  
242 The median age with HAdV infection was 4 years, ranging from 0.5 year to 14 years old, of which,  
243 60% were under 5 years. Of the 100 cases, 93 (93%) were hospitalized; the median duration of  
244 hospitalization was 3 days (1-36 days). Fourteen HAdV-positive cases were co-infected with  
245 EV/RV, 2 with RSV, 1 with influenza C.

246 The clinical diagnoses included one case of fatal pneumonia caused by HAdV-3, 3 cases of  
247 bronchitis, 5 cases of diarrhea, 2 cases of febrile seizure, 2 cases of rash, and 74 cases of upper  
248 respiratory tract infection (URTI) (Table 2).

249

250 **Table 2**

251 **Comparison of demographic and clinical characteristics of 100 children with ARD according to HAdV**  
 252 **type in Hong Kong, summer 2014.**

253

| HAdV species                      |            | All        | HAdV-B3    | HAdV-C1 | HAdV-C2   | HAdV-E4  | HAdV-C6   | HAdV-B7 | Recombinant<br>Coinfect |
|-----------------------------------|------------|------------|------------|---------|-----------|----------|-----------|---------|-------------------------|
| Numbers                           |            | 100        | 74         | 1       | 3         | 10       | 2         | 1       | 7                       |
| Gender (M/F)                      |            | 50/49      | 38/35      | 0/1     | 2/1       | 3/7      | 1/1       | 1/0     | 5/2                     |
| Age (range)                       |            | 4 (0.5-14) | 2.5 (1-14) | 4 (4)   | 3 (0.5-7) | 5 (1-11) | 3.5 (3-4) | 7 (7)   | 2 (1-9)                 |
| Nationality                       | Chinese    | 86         | 63         | 1       | 1         | 9        | 2         | 1       | 7                       |
|                                   | Occidental | 2          | 2          | -       | -         | -        | -         | -       | -                       |
|                                   | Korean     | 1          | 1          | -       | -         | -        | -         | -       | -                       |
|                                   | Indian     | 1          | 1          | -       | -         | -        | -         | -       | -                       |
|                                   | Nepalese   | 3          | 1          | -       | 2         | -        | -         | -       | -                       |
| Hospitalized Numbers              |            | 93         | 68         | 1       | 3         | 9        | 2         | 2       | 6                       |
| Hospitalized day (range)          |            | 3 (1-36)   | 3 (1-36)   | 3 (3)   | 3 (2-4)   | 2 (1-15) | 2.5 (2-3) | 4 (4)   | 2 (2-3)                 |
| Co-infection                      | EV/RV      | 14         | 10         | -       | 1         | 2        | -         | -       | -                       |
|                                   | RSV        | 2          | 1          | -       | -         | 1        | -         | -       | -                       |
|                                   | Flu C      | 1          | 1          | -       | -         | -        | -         | -       | -                       |
| Clinical Diagnosis                |            |            |            |         |           |          |           |         |                         |
| URTI                              |            | 74         | 55         |         | 3         | 8        | 1         |         | 6                       |
| Diarrhea                          |            | 5          | 3          | 1       |           |          |           |         | 1                       |
| Bronchiolitis                     |            | 3          | 2          |         |           |          |           |         |                         |
| Febrile seizure                   |            | 3          | 3          |         |           |          |           |         |                         |
| Pneumonia*                        |            | 1          | 1*         |         |           |          |           |         |                         |
| Rash                              |            | 2          | 2          |         |           |          |           |         |                         |
| Adenoviremia transplant recipient |            | 1          | -          |         |           | 1        |           |         |                         |
| Conjunctivitis/ Febrile seizure   |            | 1          | 1          |         |           |          |           |         |                         |
| Fever/ GE                         |            | 1          | -          |         |           |          |           | 1       |                         |
| Intussusception                   |            | 1          | -          |         |           |          | 1         |         |                         |
| N/A                               |            | 8          | 7          |         |           | 1        |           |         |                         |

254 **\*: dead.**

255

256



257

## 258 **Molecular typing of HAdV clinical samples**

259 One hundred throat swab specimens were subsequently detected by PCR using the three pairs of  
260 universal primers. The PCR products were sequenced. BLAST analysis confirmed that 74 cases  
261 were HAdV-B3, 10 cases were HAdV-E4, 6 cases were HAdV-C2, 2 cases were HAdV-C6, 1 case  
262 were HAdV-B7, 1 case was HAdV-C1, and 4 cases were infected by recombination HAdVs or  
263 co-infected by different types of HAdVs; the other 2 cases were PCR negative (Fig. 2A). The 4  
264 cases infected by recombinants or co-infected by different HAdV types were HK39 [P7H55F7],  
265 HK42 [P1H1F3], HK61 [P1H5F2], and HK76 [P1H2F2].

266

## 267 **Phylogenetic analysis of HAdV clinical samples**

268 Phylogenetic analysis of the hexon, penton base, and fiber gene of Hong Kong isolates were shown  
269 in fig 2. The phylogenetic analysis results were consistent with the BLAST results. Panels (B),  
270 (C), and (D) display the phylogenetic relationships of the penton base, hexon, and fiber genes,  
271 respectively, of the 100 clinical HAdV strains. HAdV-B3 (n = 74) was the most prevalent types.  
272 Three capsid genes formed a subclade with another China HAdV-3 isolate Guangzhou01 circulating  
273 in 2004(10). HAdV-E4 was the second most prevalent strain (n = 10).

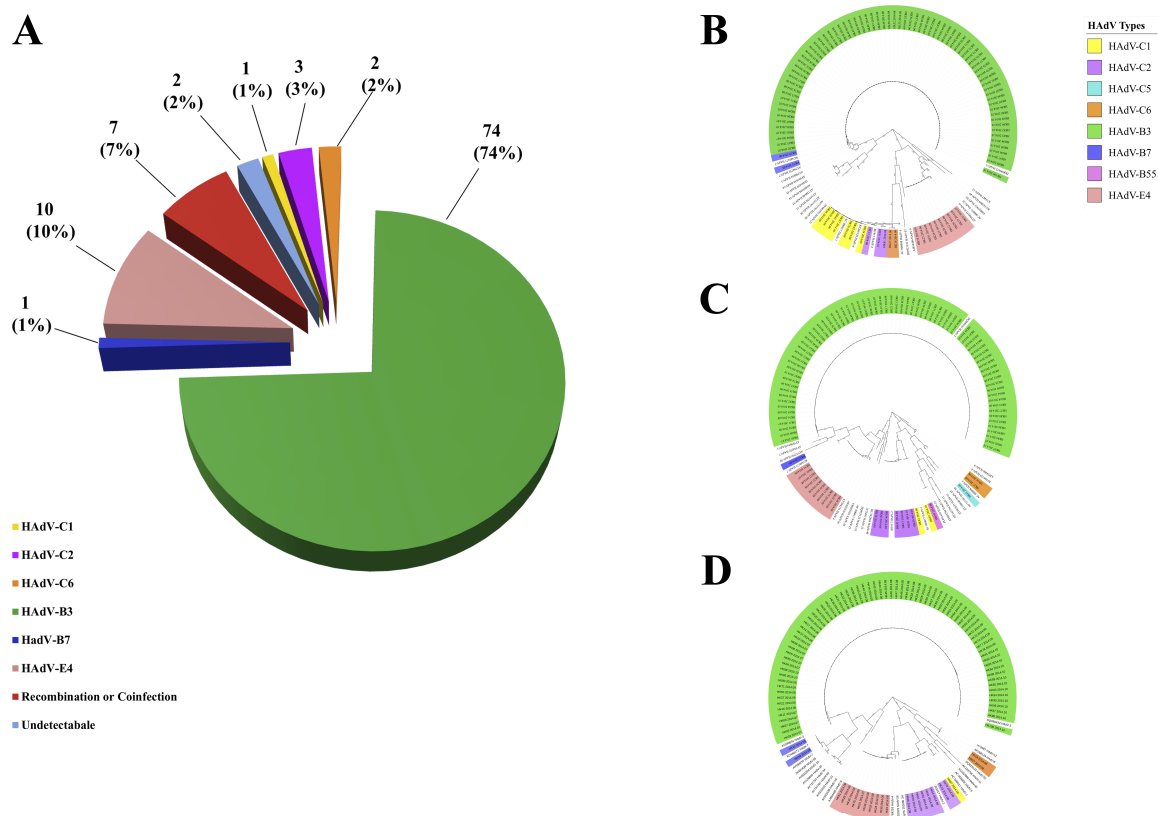

274

275 Fig.2 A. HAdV type distribution in hospitalized children with ARIs from July through October, 2014. And

276 Panels (B), (C), and (D) display the phylogenetic relationships of the penton base, hexon, and fiber genes,

277 respectively, of the 98 clinical HAdV strains. Additional reference sequences were retrieved from GenBank to

278 provide context. The phylogenetic trees were generated based on the Tree-Bisection-Reconnection (TBR) model by

279 MEGA 7.0 ([www.megasoftware.net/](http://www.megasoftware.net/)) using the maximum parsimony method with 1,000 boot-strap replicates and

280 default parameters. The percentage of trees in which the associated taxa clustered together is shown next to the

281 branches. The scale bar is in units of nucleotide substitutions per site.

282

### 283 **GenBank accession numbers of the capsid protein genes from clinical isolates.**

284 The PCR products of the penton base, hexon, and fiber genes from the thirty throat swab

285 specimens were sequenced. These were submitted to GenBank. GenBank accession numbers are

286 as follows:

287

288

## 289 **DISCUSSION**

290 PCR and sequencing analysis of microbial DNA have been used for quick identification and  
291 better characterization of the pathogens (60). The identification of HAdV types was traditionally  
292 performed by hexon protein analysis, *e.g.*, virus neutralization, which depends on the interaction  
293 between type-specific antisera and type-specific antigenic epitopes in HVRs of the hexon protein  
294 (61), or by limited hexon gene sequencing (62). The time-consuming and labor-intensive epitope  
295 detection method is seldom used today; the limited partial hexon sequencing provides partial and  
296 incomplete identification, as any recombinant HAdV will be missed. As a gold standard, whole  
297 genome sequencing and analysis is the most accurate method to identify, characterize, and type  
298 HAdVs. This is borne out by recent recognition of new genotypes that include recombinant HAdVs  
299 identified by this whole genome analysis method, including important pathogenic and emergent  
300 HAdVs. As an example, HAdV-D53 was recognized as a new genotype because genome  
301 recombination was detected amongst the three major capsid genes. The penton base, hexon, and  
302 fiber genes originated from HAdV-D37, HAdV-D22, and HAdV-D8, respectively (51). Another  
303 example is the emergent genotype HAdV-B55 (40, 56). This is a highly contagious recombinant  
304 respiratory pathogen that contains the hexon epitope from a urinary tract pathogen HAdV-B11 and  
305 the penton base and fiber genes from a respiratory tract pathogen HAdV-B14.

306

307 Given that whole genome sequencing is still relatively cost-prohibitive, particularly for large  
308 numbers of samples comprising outbreak and population sampling projects, and that genome

309 recombination may only be indicated by assaying marker genes across the genome, such as the  
310 penton base, hexon, and fiber genes, a simple, rapid, cost-effective, practical, and universal detection  
311 and typing method for characterizing HAdVs is presented in this study. This protocol calls for  
312 using three pairs of universal PCR primers to target variable regions of the three capsid genes to  
313 provide products for characterizing the adenoviral isolates. The subsequent amplicon sequencing  
314 and BLAST analysis provides information as to the type identity and whether there is any  
315 recombination across the genome. This method was validated by typing 30 clinical specimens  
316 successfully. In practice, all three pairs of universal primers that we chose and optimized work for  
317 HAdV-B3, -B7, -B11, -B14, -B21, -B55, -C5, -D19, and -E4. Because the HAdV-C fiber gene  
318 sequences are phylogenetically distinct from the other species, to compensate, we designed a specific  
319 primer Fiber-CR, which worked well for the HAdV-C fiber amplification. The universal primers  
320 for penton base and hexon genes successfully amplified the assayed types across species B to F,  
321 although the genomic sequences between different species are diverse. Isolates from the set of  
322 genotypes representing species HAdV-B, -C, -D, and -E can be detected and type-identified by this  
323 protocol with these universal primers, including putative recombinants: the HAdV-B55 isolates.

324 In contrast to a commonly used HAdV typing protocol published by Lu *et al.* (62) and others  
325 which were based solely on the PCR amplification and/or sequencing of the HAdV hexon gene (56,  
326 63-65), the method presented in this report is more informative. Additionally, the Lu *et al.* protocol  
327 targets only the HVR1-6 (62) rather than the entire epitope. Although HVR1-6 contain  
328 type-specific epitopes, the adjacent HVR-7 region does as well (65, 66). And as noted, these  
329 hexon-centric methods do not identify recombination across the genome, which appears to be an  
330 important molecular evolution mechanism in the genesis of novel HAdVs, as noted by the recent

331 characterization and recognition of several emergent human adenoviral pathogens (39, 40, 44-52).  
332 On the contrary, our PCR amplification and DNA sequencing method not only targets three genes  
333 that essentially span the genome, but includes seven HVRs, which will identify any recombination  
334 within the hexon epitopes as well. The three PCR reactions can be performed concurrently and  
335 rapidly, saving the detection time. This method will economically provide the identification and  
336 characterization of HAdVs, particularly recombinants, in the real-time surveillance, sampling, and  
337 screening of circulating large numbers of adenovirus isolates during outbreaks and in populations for  
338 clinical microbiologists, public health officers, and epidemiologists.

339

340

#### 341 **ACKNOWLEDGEMENTS**

342 We thank the Guangzhou Women and Children's Medical Center, Zhujiang Hospital, Hubei CDC,  
343 and Guangdong CDC for providing clinical throat swab specimens.

344

#### 345 **FUNDING INFORMATION**

346 This work was supported by grants from the National Key Research and Development Program of  
347 China (2018YFE0204503), National Natural Science Foundation of China (81730061), Natural  
348 Science Foundation of Guangdong Province (2018B030312010) as well as the Guangzhou  
349 Healthcare Collaborative Innovation Major Project (201803040004 and 201803040007).

350

351

352

353

354

## References

355

356 1. Carballal G, Videla CM, Espinosa MA, Savy V, Uez O, Sequeira MD, et al. Multicentered study of viral acute lower  
357 respiratory infections in children from four cities of Argentina, 1993-1994. *Journal of medical virology*. 2001  
358 Jun;64(2):167-74.

359 2. Lion T. Adenovirus infections in immunocompetent and immunocompromised patients. *Clinical microbiology  
360 reviews*. 2014 Jul;27(3):441-62.

361 3. Carr MJ, Kajon AE, Lu X, Dunford L, O'Reilly P, Holder P, et al. Deaths Associated with Human Adenovirus-14p1  
362 Infections, Europe, 2009–2010. *Emerging Infectious Diseases*. 2011;17(8):1402-8.

363 4. Rebelo-de-Andrade H, Pereira C, Giria M, Prudencio E, Brito MJ, Cale E, et al. Outbreak of acute respiratory  
364 infection among infants in Lisbon, Portugal, caused by human adenovirus serotype 3 and a new 7/3 recombinant strain. *J  
365 Clin Microbiol*. 2010 Apr;48(4):1391-6.

366 5. Girouard G, Garceau R, Thibault L, Bourque C, Bastien N, Li Y. Province-wide adenovirus type 3 outbreak with  
367 severe cases in New Brunswick. *The Canadian journal of infectious diseases & medical microbiology = Journal canadien  
368 des maladies infectieuses et de la microbiologie medicale*. 2011 Spring;22(1):e4-6.

369 6. Yu Z, Zeng Z, Zhang J, Pan Y, Chen M, Guo Y, et al. Fatal Community-acquired Pneumonia in Children Caused by  
370 Re-emergent Human Adenovirus 7d Associated with Higher Severity of Illness and Fatality Rate. *Scientific reports*. 2016  
371 Nov 16;6:37216.

372 7. Zhang SY, Luo YP, Huang DD, Fan H, Lu QB, Wo Y, et al. Fatal pneumonia cases caused by human adenovirus 55  
373 in immunocompetent adults. *Infectious diseases*. 2016;48(1):40-7.

374 8. Cui X, Wen L, Wu Z, Liu N, Yang C, Liu W, et al. Human adenovirus type 7 infection associated with severe and  
375 fatal acute lower respiratory illness and nosocomial transmission. *J Clin Microbiol*. 2015 Feb;53(2):746-9.

376 9. Sun B, He H, Wang Z, Qu J, Li X, Ban C, et al. Emergent severe acute respiratory distress syndrome caused by  
377 adenovirus type 55 in immunocompetent adults in 2013: a prospective observational study. *Critical care (London,  
378 England)*. 2014 Aug 12;18(4):456.

379 10. Zhang Q, Su X, Gong S, Zeng Q, Zhu B, Wu Z, et al. Comparative genomic analysis of two strains of human  
380 adenovirus type 3 isolated from children with acute respiratory infection in southern China. *The Journal of general  
381 virology*. 2006 Jun;87(Pt 6):1531-41.

382 11. Zeng Z, Zhang J, Jing S, Cheng Z, Bofill-Mas S, Maluquer de Motes C, et al. Genome Sequence of a Cynomolgus  
383 Macaque Adenovirus (CynAdV-1) Isolate from a Primate Colony in the United Kingdom. *Genome announcements*. 2016  
384 Nov 03;4(6).

385 12. Chen Y, Liu F, Wang C, Zhao M, Deng L, Zhong J, et al. Molecular Identification and Epidemiological Features of  
386 Human Adenoviruses Associated with Acute Respiratory Infections in Hospitalized Children in Southern China,  
387 2012-2013. *PloS one*. 2016;11(5):e0155412.

388 13. Zhao S, Wan C, Ke C, Seto J, Dehghan S, Zou L, et al. Re-emergent human adenovirus genome type 7d caused an  
389 acute respiratory disease outbreak in Southern China after a twenty-one year absence. *Scientific reports*. 2014 Dec  
390 08;4:7365.

391 14. Madisch I, Wolfel R, Harste G, Pommer H, Heim A. Molecular identification of adenovirus sequences: a rapid  
392 scheme for early typing of human adenoviruses in diagnostic samples of immunocompetent and immunodeficient  
393 patients. *Journal of medical virology*. 2006 Sep;78(9):1210-7.

394 15. Kajon AE, Moseley JM, Metzgar D, Huong HS, Wadleigh A, Ryan MA, et al. Molecular epidemiology of  
395 adenovirus type 4 infections in US military recruits in the postvaccination era (1997-2003). *The Journal of infectious  
396 diseases*. 2007 Jul 01;196(1):67-75.

- 397 16. Zhang Q, Seto D, Zhao S, Zhu L, Zhao W, Wan C. Genome sequence of the first human adenovirus type 14 isolated  
398 in China. *J Virol*. 2012 June;86(12):7019-20.
- 399 17. Lu X, Amita Joshi and Phyllis Flomenberg. Adenoviruses. *Viral Infections of Humans*. 2014:23.
- 400 18. Chang SY, Lee CN, Lin PH, Huang HH, Chang LY, Ko W, et al. A community-derived outbreak of adenovirus type  
401 3 in children in Taiwan between 2004 and 2005. *Journal of medical virology*. 2008 Jan;80(1):102-12.
- 402 19. Lee J, Choi EH, Lee HJ. Comprehensive serotyping and epidemiology of human adenovirus isolated from the  
403 respiratory tract of Korean children over 17 consecutive years (1991-2007). *Journal of medical virology*. 2010  
404 Apr;82(4):624-31.
- 405 20. Erdman DD, Xu W, Gerber SI, Gray GC, Schnurr D, Kajon AE, et al. Molecular epidemiology of adenovirus type 7  
406 in the United States, 1966-2000. *Emerg Infect Dis*. 2002 Mar;8(3):269-77.
- 407 21. Piedra PA, Poveda GA, Ramsey B, McCoy K, Hiatt PW. Incidence and prevalence of neutralizing antibodies to the  
408 common adenoviruses in children with cystic fibrosis: implication for gene therapy with adenovirus vectors. *Pediatrics*.  
409 1998 Jun;101(6):1013-9.
- 410 22. Schmitz H, Wigand R, Heinrich W. Worldwide epidemiology of human adenovirus infections. *American journal of*  
411 *epidemiology*. 1983 Apr;117(4):455-66.
- 412 23. Gray GC, McCarthy T, Lebeck MG, Schnurr DP, Russell KL, Kajon AE, et al. Genotype prevalence and risk factors  
413 for severe clinical adenovirus infection, United States 2004-2006. *Clinical infectious diseases : an official publication of*  
414 *the Infectious Diseases Society of America*. 2007 Nov 1;45(9):1120-31.
- 415 24. Li QG, Zheng QJ, Liu YH, Wadell G. Molecular epidemiology of adenovirus types 3 and 7 isolated from children  
416 with pneumonia in Beijing. *Journal of medical virology*. 1996 Jul;49(3):170-7.
- 417 25. Kajon AE, Mistchenko AS, Videla C, Hortal M, Wadell G, Avendano LF. Molecular epidemiology of adenovirus  
418 acute lower respiratory infections of children in the south cone of South America (1991-1994). *Journal of medical*  
419 *virology*. 1996 Feb;48(2):151-6.
- 420 26. Lin KH, Lin YC, Chen HL, Ke GM, Chiang CJ, Hwang KP, et al. A two decade survey of respiratory adenovirus in  
421 Taiwan: the reemergence of adenovirus types 7 and 4. *Journal of medical virology*. 2004 Jun;73(2):274-9.
- 422 27. Wang YF, Shen FC, Wang SL, Kuo PH, Tsai HP, Liu CC, et al. Molecular Epidemiology and Clinical  
423 Manifestations of Adenovirus Respiratory Infections in Taiwanese Children. *Medicine*. 2016 May;95(18):e3577.
- 424 28. Tsou TP, Tan BF, Chang HY, Chen WC, Huang YP, Lai CY, et al. Community outbreak of adenovirus, Taiwan, 2011.  
425 *Emerg Infect Dis*. 2012 Nov;18(11):1825-32.
- 426 29. Han G, Niu H, Zhao S, Zhu B, Wang C, Liu Y, et al. Identification and typing of respiratory adenoviruses in  
427 Guangzhou, Southern China using a rapid and simple method. *Virologica Sinica*. 2013 Apr;28(2):103-8.
- 428 30. Kolavic-Gray SA, Binn LN, Sanchez JL, Cersovsky SB, Polyak CS, Mitchell-Raymundo F, et al. Large epidemic of  
429 adenovirus type 4 infection among military trainees: epidemiological, clinical, and laboratory studies. *Clinical infectious*  
430 *diseases : an official publication of the Infectious Diseases Society of America*. 2002 Oct 1;35(7):808-18.
- 431 31. Sanchez JL, Binn LN, Innis BL, Reynolds RD, Lee T, Mitchell-Raymundo F, et al. Epidemic of adenovirus-induced  
432 respiratory illness among US military recruits: epidemiologic and immunologic risk factors in healthy, young adults.  
433 *Journal of medical virology*. 2001 Dec;65(4):710-8.
- 434 32. James L, Vernon MO, Jones RC, Stewart A, Lu X, Zollar LM, et al. Outbreak of human adenovirus type 3 infection  
435 in a pediatric long-term care facility--Illinois, 2005. *Clinical infectious diseases : an official publication of the Infectious*  
436 *Diseases Society of America*. 2007 Aug 15;45(4):416-20.
- 437 33. Barrero PR, Valinotto LE, Tittarelli E, Mistchenko AS. Molecular typing of adenoviruses in pediatric respiratory  
438 infections in Buenos Aires, Argentina (1999-2010). *Journal of clinical virology : the official publication of the Pan*  
439 *American Society for Clinical Virology*. 2012 Feb;53(2):145-50.

- 440 34. Tan D, Zhu H, Fu Y, Tong F, Yao D, Walline J, et al. Severe Community-Acquired Pneumonia Caused by Human  
441 Adenovirus in Immunocompetent Adults: A Multicenter Case Series. *PloS one*. 2016;11(3):e0151199.
- 442 35. Li X, Kong M, Su X, Zou M, Guo L, Dong X, et al. An outbreak of acute respiratory disease in China caused by  
443 human adenovirus type B55 in a physical training facility. *International journal of infectious diseases : IJID : official  
444 publication of the International Society for Infectious Diseases*. 2014 Nov;28:117-22.
- 445 36. Yi L, Zou L, Lu J, Kang M, Song Y, Su J, et al. A cluster of adenovirus type B55 infection in a neurosurgical  
446 inpatient department of a general hospital in Guangdong, China. *Influenza and other respiratory viruses*. 2017  
447 Jul;11(4):328-36.
- 448 37. Dongliu Y, Guoliang Y, Haocheng X, Shuaijia Q, Li B. Outbreak of acute febrile respiratory illness caused by  
449 human adenovirus B P14H11F14 in a military training camp in Shandong China. *Archives of virology*. 2016  
450 Sep;161(9):2481-9.
- 451 38. XIE Y-x, TU B, CHEN W-w, ZHOU Z-p, NIE W-m, WANG C-l, et al. Clinical characteristics of 80 hospitalized  
452 cases of human adenovirus type 55 infection. *Infect Dis Info*. 2013;26(1):45-7.
- 453 39. Matsushima Y, Shimizu H, Phan TG, Ushijima H. Genomic characterization of a novel human adenovirus type 31  
454 recombinant in the hexon gene. *The Journal of general virology*. 2011 Dec;92(Pt 12):2770-5.
- 455 40. Walsh MP, Seto J, Jones MS, Chodosh J, Xu W, Seto D. Computational analysis identifies human adenovirus type  
456 55 as a re-emergent acute respiratory disease pathogen. *J Clin Microbiol*. 2010 Mar;48(3):991-3.
- 457 41. Kaneko H, Aoki K, Ishida S, Ohno S, Kitaichi N, Ishiko H, et al. Recombination analysis of intermediate human  
458 adenovirus type 53 in Japan by complete genome sequence. *The Journal of general virology*. 2011 Jun;92(Pt 6):1251-9.
- 459 42. Zhou X, Robinson CM, Rajaiya J, Dehghan S, Seto D, Jones MS, et al. Analysis of human adenovirus type 19  
460 associated with epidemic keratoconjunctivitis and its reclassification as adenovirus type 64. *Investigative ophthalmology  
461 & visual science*. 2012 May 14;53(6):2804-11.
- 462 43. Seto J, Walsh MP, Mahadevan P, Zhang Q, Seto D. Applying genomic and bioinformatic resources to human  
463 adenovirus genomes for use in vaccine development and for applications in vector development for gene delivery.  
464 *Viruses*. 2010 Jan;2(1):1-26.
- 465 44. Robinson CM, Singh G, Henquell C, Walsh MP, Peigue-Lafeuille H, Seto D, et al. Computational analysis and  
466 identification of an emergent human adenovirus pathogen implicated in a respiratory fatality. *Virology*. 2011 Jan  
467 20;409(2):141-7.
- 468 45. Liu EB, Ferreyra L, Fischer SL, Pavan JV, Nates SV, Hudson NR, et al. Genetic analysis of a novel human  
469 adenovirus with a serologically unique hexon and a recombinant fiber gene. *PloS one*. 2011;6(9):e24491.
- 470 46. Zhang Q, Seto D, Cao B, Zhao S, Wan C. Genome sequence of human adenovirus type 55, a re-emergent acute  
471 respiratory disease pathogen in China. *Journal of virology*. 2012 Nov;86(22):12441-2.
- 472 47. Hage E, Gerd Liebert U, Bergs S, Ganzenmueller T, Heim A. Human mastadenovirus type 70: a novel, multiple  
473 recombinant species D mastadenovirus isolated from diarrhoeal faeces of a haematopoietic stem cell transplantation  
474 recipient. *The Journal of general virology*. 2015 Sep;96(9):2734-42.
- 475 48. Liu EB, Wadford DA, Seto J, Vu M, Hudson NR, Thrasher L, et al. Computational and serologic analysis of novel  
476 and known viruses in species human adenovirus D in which serology and genomics do not correlate. *PloS one*.  
477 2012;7(3):e33212.
- 478 49. Ishiko H, Shimada Y, Konno T, Hayashi A, Ohguchi T, Tagawa Y, et al. Novel human adenovirus causing  
479 nosocomial epidemic keratoconjunctivitis. *J Clin Microbiol*. 2008 Jun;46(6):2002-8.
- 480 50. Ishiko H, Aoki K. Spread of epidemic keratoconjunctivitis due to a novel serotype of human adenovirus in Japan. *J  
481 Clin Microbiol*. 2009 Aug;47(8):2678-9.



- 482 51. Walsh MP, Chintakuntlawar A, Robinson CM, Madisch I, Harrach B, Hudson NR, et al. Evidence of molecular  
483 evolution driven by recombination events influencing tropism in a novel human adenovirus that causes epidemic  
484 keratoconjunctivitis. *PloS one*. 2009 Jun 03;4(6):e5635.
- 485 52. Walsh MP, Seto J, Liu EB, Dehghan S, Hudson NR, Lukashev AN, et al. Computational analysis of two species C  
486 human adenoviruses provides evidence of a novel virus. *J Clin Microbiol*. 2011 Oct;49(10):3482-90.
- 487 53. Dongliu Y, Guoliang Y, Haocheng X, Shuaijia Q, Li B, Yanglei J. Outbreak of acute febrile respiratory illness  
488 caused by human adenovirus B P14H11F14 in a military training camp in Shandong China. *Archives of virology*. 2016  
489 Sep;161(9):2481-9.
- 490 54. Yang Z, Zhu Z, Tang L, Wang L, Tan X, Yu P, et al. Genomic analyses of recombinant adenovirus type 11a in China.  
491 *J Clin Microbiol*. 2009 Oct;47(10):3082-90.
- 492 55. Zhang Q, Dehghan S, Seto D. Pitfalls of restriction enzyme analysis in identifying, characterizing, typing, and  
493 naming viral pathogens in the era of whole genome data, as illustrated by HAdV type 55. *Virologica Sinica*. 2016  
494 Oct;31(5):448-53.
- 495 56. Zhu Z, Zhang Y, Xu S, Yu P, Tian X, Wang L, et al. Outbreak of acute respiratory disease in China caused by B2  
496 species of adenovirus type 11. *J Clin Microbiol*. 2009 Mar;47(3):697-703.
- 497 57. Simmonds P, Adams MJ, Benko M, Breitbart M, Brister JR, Carstens EB, et al. Consensus statement: Virus  
498 taxonomy in the age of metagenomics. *Nature reviews Microbiology*. 2017 Mar;15(3):161-8.
- 499 58. Zhang Q, Seto D, Zhao S, Zhu L, Zhao W, Wan C. Genome sequence of the first human adenovirus type 14 isolated  
500 in China. *Journal of virology*. 2012 Jun;86(12):7019-20.
- 501 59. Zhang Q, Jing S, Cheng Z, Yu Z, Dehghan S, Shamsaddini A, et al. Comparative genomic analysis of two emergent  
502 human adenovirus type 14 respiratory pathogen isolates in China reveals similar yet divergent genomes. *Emerging  
503 microbes & infections*. 2017 Nov 01;6(11):e92.
- 504 60. Tang YW, Procop GW, Persing DH. Molecular diagnostics of infectious diseases. *Clinical chemistry*. 1997  
505 Nov;43(11):2021-38.
- 506 61. Madisch I, Harste G, Pommer H, Heim A. Phylogenetic analysis of the main neutralization and hemagglutination  
507 determinants of all human adenovirus prototypes as a basis for molecular classification and taxonomy. *Journal of  
508 virology*. 2005 Dec;79(24):15265-76.
- 509 62. Lu X, Erdman DD. Molecular typing of human adenoviruses by PCR and sequencing of a partial region of the  
510 hexon gene. *Archives of virology*. 2006 Aug;151(8):1587-602.
- 511 63. Pring-Akerblom P, Trijssenaar FE, Adrian T, Hoyer H. Multiplex polymerase chain reaction for subgenus-specific  
512 detection of human adenoviruses in clinical samples. *Journal of medical virology*. 1999 May;58(1):87-92.
- 513 64. Takeuchi S, Itoh N, Uchio E, Aoki K, Ohno S. Serotyping of adenoviruses on conjunctival scrapings by PCR and  
514 sequence analysis. *J Clin Microbiol*. 1999 Jun;37(6):1839-45.
- 515 65. Sarantis H, Johnson G, Brown M, Petric M, Tellier R. Comprehensive detection and serotyping of human  
516 adenoviruses by PCR and sequencing. *J Clin Microbiol*. 2004 Sep;42(9):3963-9.
- 517 66. Yuan X, Qu Z, Wu X, Wang Y, Liu L, Wei F, et al. Molecular modeling and epitopes mapping of human adenovirus  
518 type 3 hexon protein. *Vaccine*. 2009 Aug 13;27(37):5103-10.

519

520
